# Supplementary material
Source: PubMed Central journal article supplement (PMC6529211)
Supplement: NIHMS1524448-supplement-1.pdf [file NIHMS1524448-supplement-1.pdf]

**Cell Reports, Volume 26**

**Supplemental Information**

**Nanoscale Subsynaptic Domains Underlie  
the Organization of the Inhibitory Synapse**

**Kevin C. Crosby, Sara E. Gookin, Joshua D. Garcia, Katlin M. Hahm, Mark L. Dell'Acqua, and Katharine R. Smith**

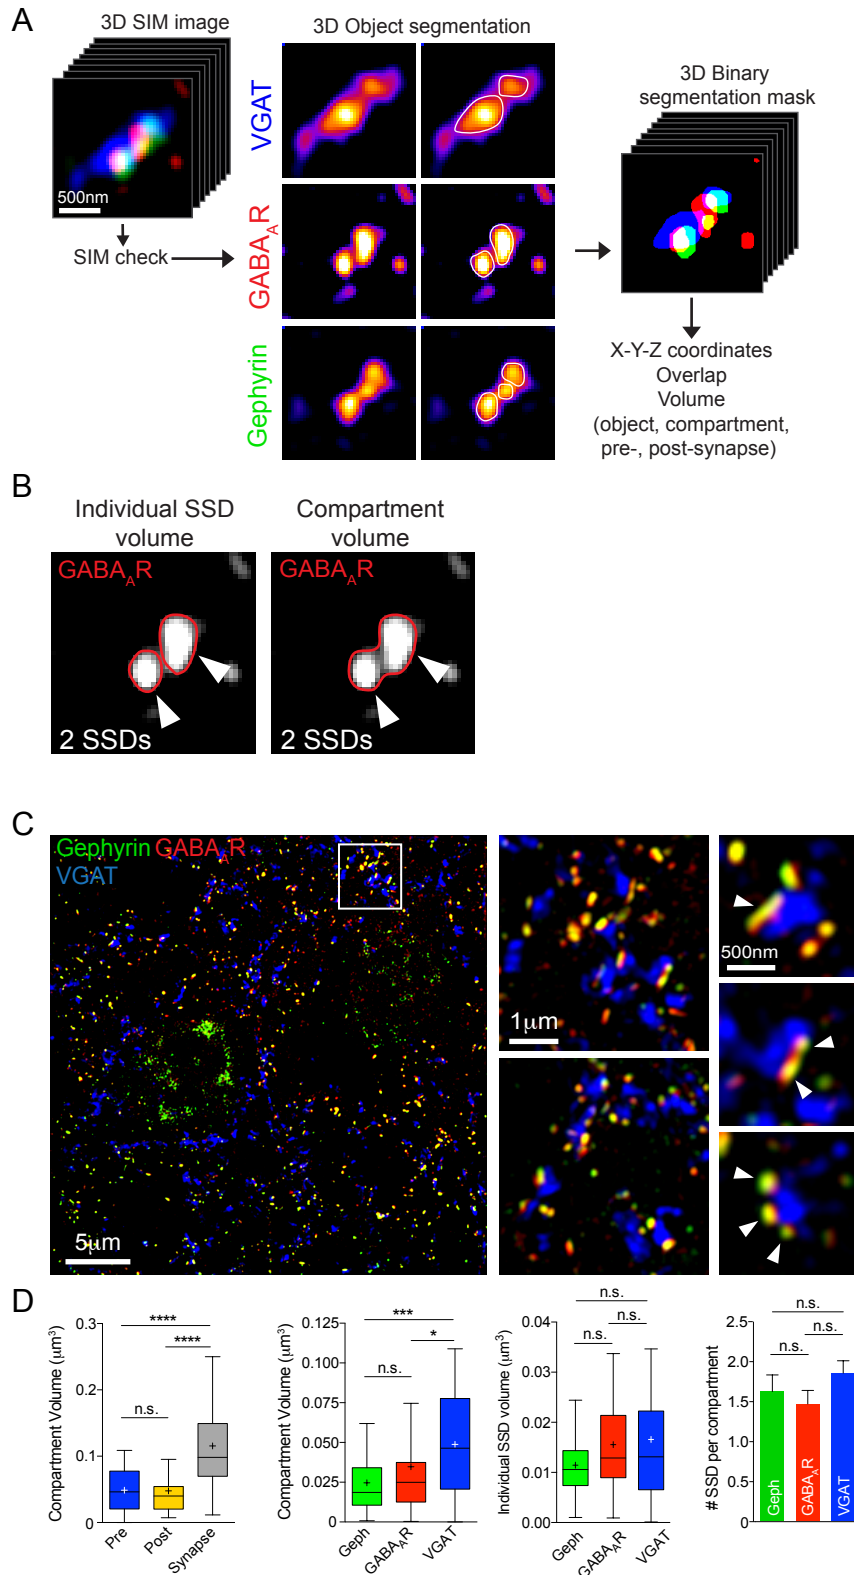

**Figure S1 Related to Figure 2. 3D segmentation analysis of SIM images and 3D-SIM in acute brain slices.** **A.** 3D segmentation protocol of 3D-SIM image, providing binary segmentation mask from which numerous parameters can be extracted. **B.** Representation of measurements of 'individual SSD volume' and 'compartment volume' for a GABA<sub>A</sub>R compartment with 2 SSDs. **C.** Maximum projection SIM image of cortical slice (layer 2/3) labeled with antibodies to gephyrin, GABA<sub>A</sub>R and VGAT. White boxes highlight magnified regions. **D.** Quantification of compartment volume, individual SSD volume and number of SSDs per synapse,  $n=58$  synapses, 10 neurons, Kruskal-Wallis tests. Cross denotes mean, horizontal line denotes median.

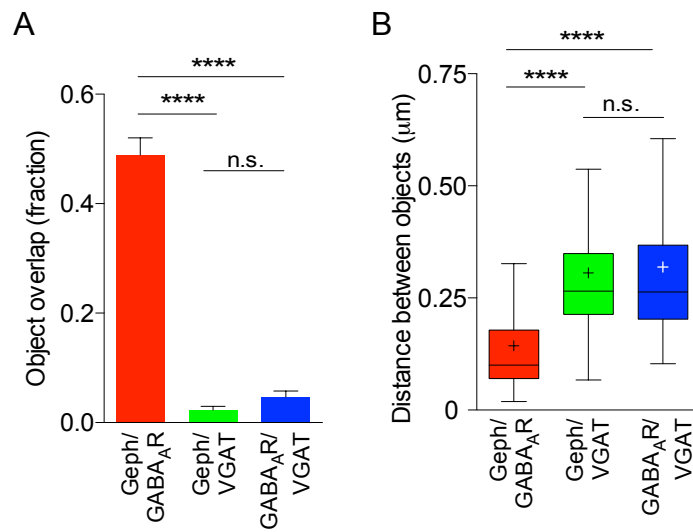

**Figure S2 Related to Figure 3. Overlap and distance analysis of inhibitory synapses in acute brain slices.**  
**A.** Mean overlap fraction for gephyrin, GABA<sub>A</sub>Rs and VGAT,  $p^{****}<0.0001$ , Kruskal-Wallis,  $n=58$  synapses. Data are represented as mean  $\pm$  SEM.  
**B.** Box plot of center-to-center distances between neighboring SSDs,  $p^{****}<0.0001$ , Kruskal-Wallis,  $n=83-89$  SSDs. Cross denotes mean, horizontal line denotes median.

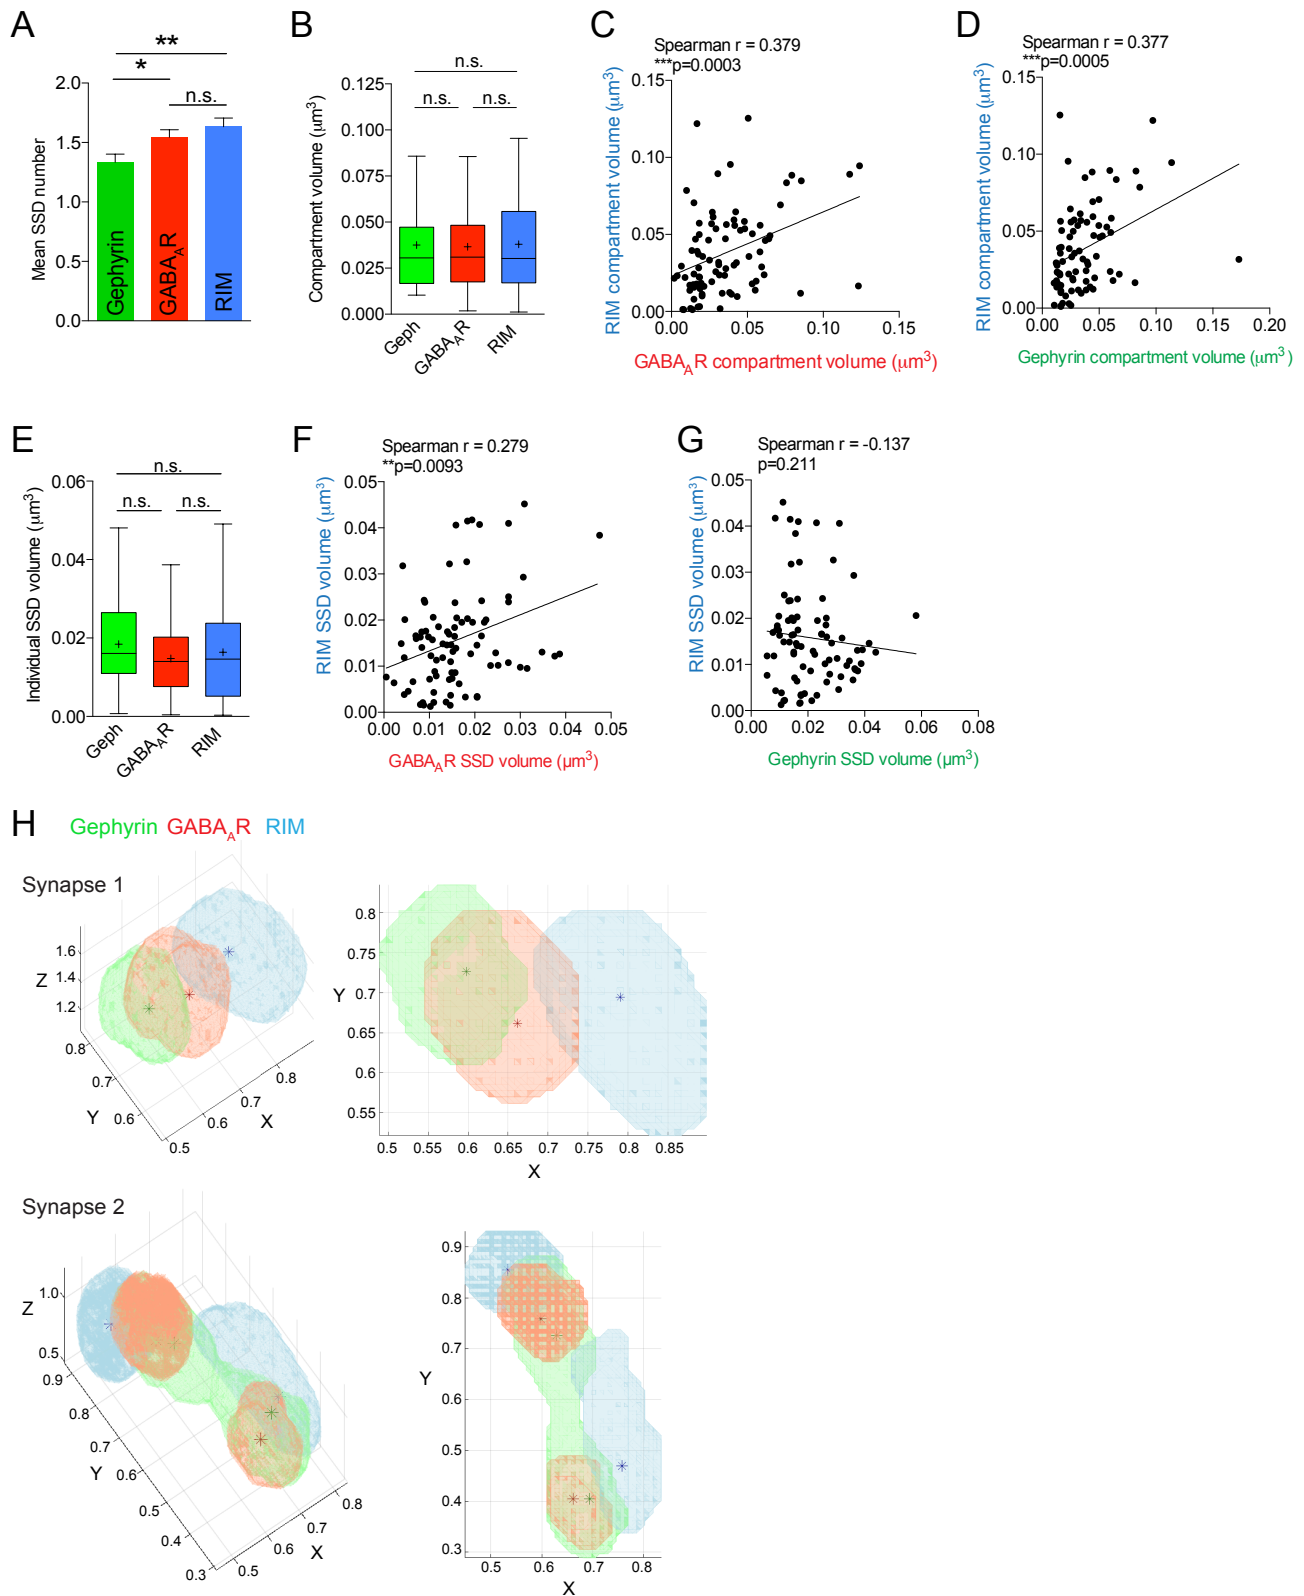

**Figure S3 Related to Figure 5. Volume data for gephyrin, GABA<sub>A</sub>Rs and RIM SSDs.**

**A.** Mean number of SSDs per compartment for gephyrin, GABA<sub>A</sub>R and RIM,  $p^{***} < 0.0010$ , Kruskal-Wallis, Dunn's post hoc,  $n = 92$  synapses. Data are represented as mean  $\pm$  SEM.

**B.** Box plot of compartment volumes for gephyrin, GABA<sub>A</sub>R and RIM, n.s., Kruskal-Wallis, Dunn's post hoc,  $n = 92$  synapses. Cross denotes mean, horizontal line denotes median.

**C.** Correlation plot of RIM compartment volume and GABA<sub>A</sub>R compartment volume per synapse,  $n = 92$  synapses.

**D.** Correlation plot of RIM compartment volume and gephyrin compartment volume per synapse,  $n = 92$  synapses.

**E.** Box plot of individual SSD volumes for gephyrin, GABA<sub>A</sub>R and RIM, n.s, Kruskal-Wallis, Dunn's post hoc,  $n = 92$  synapses. Cross denotes mean, horizontal line denotes median.

**F.** Correlation plot of RIM individual SSD volume and GABA<sub>A</sub>R individual SSD volume per synapse,  $n = 92$  synapses.

**G.** Correlation plot of RIM individual SSD volume and gephyrin individual SSD volume per synapse,  $n = 92$  synapses.

**H.** Further examples of 3D and 2D rendering of inhibitory synapses. Stars denote maximum intensity points, units =  $\mu\text{m}$ .

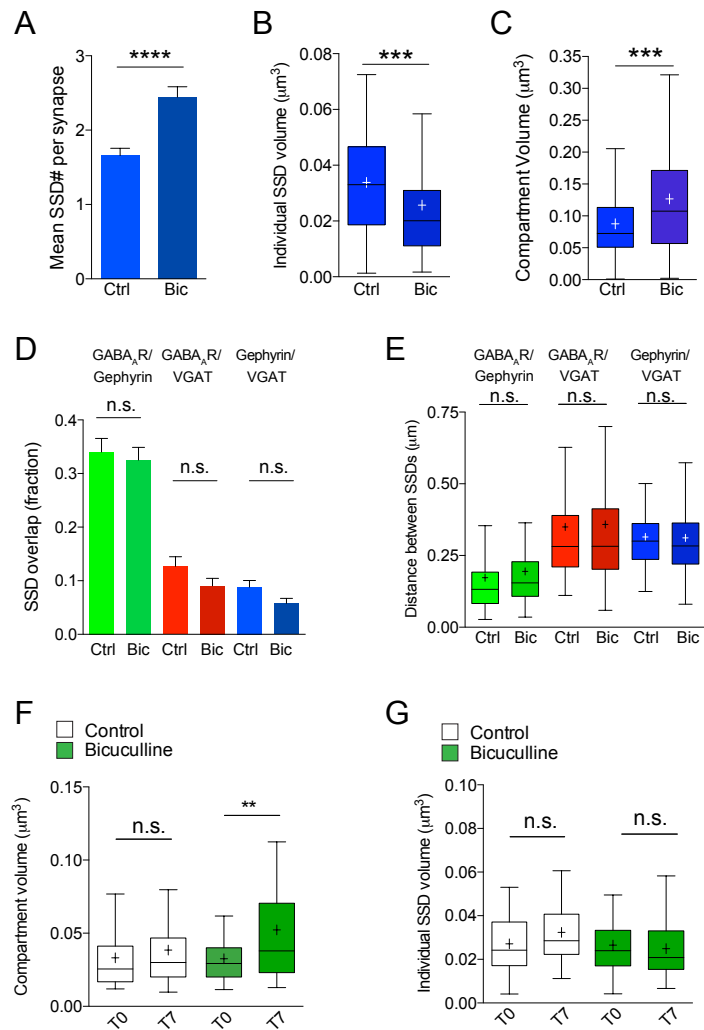

**Figure S4 Related to Figure 6. Further measurements of inhibitory synapses.**

**A.** Mean number of SSDs per VGAT compartment in control or bicuculline treated conditions., \*\*\*\* $p < 0.0001$ ,  $n = 85/97$  synapses, Mann-Whitney test. Data are represented as mean  $\pm$  SEM.

**B.** Box plot of VGAT individual SSD volume in control and bicuculline conditions, \*\*\* $p = 0.0001$ ,  $n = 85/97$  synapses, Mann-Whitney test. Cross denotes mean, horizontal line denotes median.

**C.** Box plot of VGAT compartment volume in control and bicuculline conditions,  $p = 0.002$ ,  $n = 48/73$  synapses, t-test. Cross denotes mean, horizontal line denotes median.

**D.** Mean overlap fraction for gephyrin, GABA<sub>A</sub>Rs and VGAT in control or bicuculline (Bic) treated conditions. Data are represented as mean  $\pm$  SEM.

**E.** Box plot of center-to-center distances between neighboring SSDs for gephyrin, GABA<sub>A</sub>Rs and VGAT in control or bicuculline treated conditions. Cross denotes mean, horizontal line denotes median.

**F.** Box plot of gephyrin compartment volume in control and bicuculline conditions at time 0 and 7 hours,  $p = 0.002$ ,  $n = 48/73$  synapses, t-test. Cross denotes mean, horizontal line denotes median.

**G.** Box plot of gephyrin individual SSD volume in control and bicuculline conditions at time 0 and 7 hours,  $p > 0.05$ ,  $n = 48/73$  synapses, t-test. Cross denotes mean, horizontal line denotes median.
